## RESEARCH ARTICLE

# Disruption of insulin signalling affects the neuroendocrine stress reaction in *Drosophila* females

Inga Y. Rauschenbach<sup>1</sup>, Evgenia K. Karpova<sup>1</sup>, Natalya V. Adonyeva<sup>1</sup>, Olga V. Andreenkova<sup>1</sup>, Natalya V. Faddeeva<sup>1</sup>, Elena V. Burdina<sup>1</sup>, Alexander A. Alekseev<sup>2</sup>, Petr N. Menshanov<sup>1</sup> and Natalya E. Gruntenko<sup>1,\*</sup>

**ABSTRACT**

Juvenile hormone (JH) and dopamine are involved in the stress response in insects. The insulin/insulin-like growth factor signalling pathway has also recently been found to be involved in the regulation of various processes, including stress tolerance. However, the relationships between the JH, dopamine and insulin signalling pathways remain unclear. Here, we study the role of insulin signalling in the regulation of JH and dopamine metabolism under normal and heat stress conditions in *Drosophila melanogaster* females. We show that suppression of the insulin-like receptor (InR) in the corpus allatum, a specialised endocrine gland that synthesises JH, causes an increase in dopamine level and JH-hydrolysing activity and alters the activities of enzymes that produce as well as those that degrade dopamine [alkaline phosphatase (ALP), tyrosine hydroxylase (TH) and dopamine-dependent arylalkylamine *N*-acetyltransferase (DAT)]. We also found that InR suppression in the corpus allatum modulates dopamine, ALP, TH and JH-hydrolysing activity in response to heat stress and that it decreases the fecundity of the flies. JH application restores dopamine metabolism and fecundity in females with decreased InR expression in the corpus allatum. Our data provide evidence that the insulin/insulin-like growth factor signalling pathway regulates dopamine metabolism in females of *D. melanogaster* via the system of JH metabolism and that it affects the development of the neuroendocrine stress reaction and interacts with JH in the control of reproduction in this species.

**KEY WORDS:** *Drosophila*, Insulin-like receptor, Juvenile hormone, Dopamine, Heat stress

**INTRODUCTION**

It is well known that maintenance of biological organisms under unfavourable conditions causes the development of non-specific neuroendocrine stress reactions. In insects, the components of such stress reactions include juvenile hormone (JH) and 20-hydroxyecdysone (20E), which play a gonadotropic role in adults, and the biogenic amines dopamine (DA), serotonin and octopamine (OA), which function as neurotransmitters, neuromodulators and neurohormones (Orchard et al., 1981; Davenport and Evans, 1984; Rauschenbach et al., 1987; Woodring et al., 1988; Cymborowski, 1991; Hirashima and Eto, 1993; Rauschenbach et al., 1993; Rauschenbach et al., 1995a;

Rauschenbach et al., 2004; Neckameyer and Weinstein, 2005; Andersen et al., 2006; Lalouette et al., 2007; Roesijadi et al., 2007; Gruntenko and Rauschenbach, 2008).

In earlier work, we characterised the development of the neuroendocrine stress reaction in adults of *Drosophila virilis* and *Drosophila melanogaster*. In these species, DA content increases sharply as early as 15 min after the beginning of stress exposure (38°C) (Rauschenbach et al., 1993; Hirashima et al., 2000b; Gruntenko et al., 2004). The increase in DA content is followed by a sharp decrease in the activity of the key enzyme of its synthesis, tyrosine hydroxylase (TH), and this decrease continues for up to 60 min after the onset of stress exposure (Rauschenbach et al., 1995b). A similar pattern is observed with the OA system, the only difference being that the decrease in activity of tyrosine decarboxylase, the first enzyme involved in OA synthesis, continues for up to 240 min of the stress exposure (Sukhanova et al., 1997; Hirashima et al., 2000b). The activity of alkaline phosphatase [ALP, the enzyme that regulates the pool of the DA and OA precursor tyrosine (Wright, 1987)] also decreases abruptly under stress conditions (Sukhanova et al., 1996). The JH metabolic system responds to heat stress by decreasing JH degradation (Rauschenbach et al., 1995a; Gruntenko et al., 2000; Gruntenko et al., 2003b; Rauschenbach et al., 2004). The ecdysteroid system of wild-type flies responds to a 60 min heat stress by an increase in 20E levels, and this increase continues for up to 180 min after the onset of stress exposure (Hirashima et al., 2000a; Gruntenko et al., 2003a).

In the last decade, study of the insulin/insulin-like growth factor signalling pathway (IIS) has been a focus of special interest for many researchers. In *Drosophila*, this pathway contributes to the regulation of various functions, including growth, development, reproduction, metabolic homeostasis, longevity and stress resistance (Clancy et al., 2001; Tatar et al., 2001; Belgacem and Martin, 2002; Rulifson et al., 2002; Tatar et al., 2003; Broughton et al., 2005; Shingleton et al., 2005; Belgacem and Martin, 2006; Belgacem and Martin, 2007; Piper et al., 2008; Gulia-Nuss et al., 2011). The *Drosophila* IIS has been shown to include eight insulin-like peptides as well as DILP1–8, a transcription factor of the Forkhead box class O family (dFOXO), an insulin-like receptor (InR), and the fly orthologue of mammalian insulin receptor substrates, CHICO (Toivonen and Partridge, 2009; Kannan and Fridell, 2013).

The existing data suggest that interactions occur between 20E, JH and IIS components. InR expression has been demonstrated in the corpus allatum (CA), a JH-producing gland (Belgacem and Martin, 2006; Belgacem and Martin, 2007). A mutation in the gene *InR* was shown to lead to a decrease in 20E and JH production in *Drosophila* adults *in vitro* (Tatar et al., 2001; Tu et al., 2002; Tatar et al., 2003; Tu et al., 2005). A mutation of the gene *chico*, when present in the homozygous state, results in an increase in the titre of ecdysteroids

<sup>1</sup>Institute of Cytology and Genetics, Siberian Branch of Russian Academy of Sciences, Novosibirsk 630090, Russia. <sup>2</sup>Institute of Chemical Kinetics and Combustion, Siberian Branch of Russian Academy of Sciences, Novosibirsk 630090, Russia.

\*Author for correspondence (natalya@bionet.nsc.ru)

**List of abbreviations**

|      |                                                         |
|------|---------------------------------------------------------|
| 20E  | 20-hydroxyecdysone                                      |
| ALP  | alkaline phosphatase                                    |
| CA   | corpus allatum                                          |
| DA   | dopamine                                                |
| DAT  | DA-dependent arylalkylamine <i>N</i> -acetyltransferase |
| DILP | insulin-like peptide                                    |
| IIS  | insulin/insulin-like growth factor signalling pathway   |
| InR  | insulin-like receptor                                   |
| JH   | juvenile hormone                                        |
| OA   | octopamine                                              |
| TH   | tyrosine hydroxylase                                    |

in the haemolymph of 4-day-old *D. melanogaster* females when normalised with respect to body size (Richard et al., 2005). Ecdysone was found to counteract the growth-promoting action of IIS (Colombani et al., 2005).

Considering the above, we suggest that IIS could be one of the components of the neuroendocrine stress reaction in *Drosophila* and that it could affect the development of this reaction. To verify this suggestion, we studied the effects of decreased expression of the *InR* gene in the CA on fecundity and on DA and JH metabolism under normal and heat stress conditions in females of *Drosophila*.

**RESULTS****InR expression is decreased in the corpus allatum of Aug21-Gal4/p[UAS-RNAi-InR] females**

We previously demonstrated specific expression of an Aug21-Gal4 driver in CA of *D. melanogaster* adults (Gruntenko et al., 2012b). Here, we used its recombination with P{UASp-Act5C.mRFP} to enable visualisation of CA and then crossed Aug21-Gal4; UAS-RFP flies with a p[UAS-RNAi-InR]/CyO::arm-GFP strain carrying the pUAS-RNAi-InR interference transgene to downregulate InR expression in the gland. Fig. 1 shows the results of an immunohistochemical assay of CA of 1-day-old Aug21-Gal4/p[UAS-RNAi-InR];UAS-RFP and Aug21-Gal4;UAS-RFP females using anti-InR antibodies. InR immunoreactivity (green fluorescence) is readily detectable in CA cells of control Aug21-Gal4;UAS-RFP females (Fig. 1A,Ai). In contrast, reduced InR immunoreactivity is observed in the CA of Aug21-Gal4/p[UAS-RNAi-InR];UAS-RFP females (Fig. 1B,Bi).

Note that 1-day-old Aug21-Gal4/p[UAS-RNAi-InR] females are smaller (Fig. 1C) and have lower body weights (Fig. 1D) than control p[UAS-RNAi-InR]/CyO::arm-GFP females (differences are significant at  $P<0.001$ ).

**Decreased expression of InR in CA results in an increase in JH degradation and an increase in the response of the JH degradation system to heat stress**

We studied the effect of decreased InR expression in CA cells on JH metabolism under normal and heat stress conditions in 1-day-old Aug21-Gal4/p[UAS-RNAi-InR] (*InR*<sup>-</sup>) females compared with control p[UAS-RNAi-InR]/CyO::arm-GFP females [*InR*<sup>+</sup>(1)] as well as with females of the parental strains p[UAS-RNAi-InR]/CyO [*InR*<sup>+</sup>(2)] and Aug21-Gal4/CyO::arm-GFP [*InR*<sup>+</sup>(3)]. The results are shown in Fig. 2A. In females that downregulate InR in CA (i.e. Aug21-Gal4/p[UAS-RNAi-InR]), JH degradation levels were significantly higher than in the controls. Comparison of InR downregulation and heat stress effects on the JH degradation level by two-way ANOVA with genotype and temperature as fixed factors revealed significant effects of genotype ( $F_{3,217}=33.79$ ,  $P<0.00001$ ) and heat stress ( $F_{1,62}=133.66$ ,  $P<0.00001$ ). A significant interaction

of these factors ( $F_{3,217}=7.75$ ,  $P<0.0001$ ) was also found. No significant differences in JH degradation were found in any of the control groups (p[UAS-RNAi-InR]/CyO::arm-GFP, p[UAS-RNAi-InR]/CyO and Aug21-Gal4/CyO::arm-GFP) (Fig. 2A).

To assess the effect of InR downregulation in CA on the response of the JH metabolic system to stress, we calculated the stress reactivity of the JH degradation system (percentage decrease in JH degradation level following heat stress relative to its value under normal conditions) in all of the studied groups. The control groups did not differ in JH stress reactivity ( $17\pm 2$  for p[UAS-RNAi-InR]/CyO::arm-GFP,  $15\pm 1$  for p[UAS-RNAi-InR]/CyO and  $15\pm 1$  for Aug21-Gal4/CyO::arm-GFP). In contrast, an increase in JH stress reactivity was observed in Aug21-Gal4/p[UAS-RNAi-InR] females ( $26\pm 1$ ) versus controls (one-way ANOVA:  $F_{3,110}=13.37$ ,  $P<0.00001$  with respect to JH stress reactivity).

**JH treatment rescues JH degradation and JH stress reactivity in Aug21-Gal4/p[UAS-RNAi-InR] females**

In a previous study, we showed that the rate of JH degradation is an indicator of the level of hormone production: a decrease in juvenile hormone synthesis leads to an increase in its degradation and in the stress reactivity of the JH degrading system (Gruntenko et al., 2010). To confirm that the changes in the level of JH-hydrolysing activity and JH stress reactivity found in Aug21-Gal4/p[UAS-RNAi-InR] females were due to decreased JH production resulting from decreased InR expression in CA, we studied the effect of exogenous JH on these parameters. We treated 1-day-old Aug21-Gal4/p[UAS-RNAi-InR] females with JH dissolved in acetone and measured their JH-hydrolysing activity. For comparison, Aug21-Gal4/p[UAS-RNAi-InR] and p[UAS-RNAi-InR]/CyO::arm-GFP females were treated with acetone. Half of the individuals of each group under study were exposed to heat stress (Fig. 2B).

The results of these experiments show that JH treatment of Aug21-Gal4/p[UAS-RNAi-InR] (*InR*<sup>-</sup>) females decreases JH degradation to the level typical of p[UAS-RNAi-InR]/CyO::arm-GFP [*InR*<sup>+</sup>(1)] females (Fig. 2B). Comparison of the effects of JH treatment and heat stress on JH degradation in JH and acetone-treated Aug21-Gal4/p[UAS-RNAi-InR] females by two-way ANOVA with JH treatment and temperature as fixed factors revealed significant effects of JH treatment ( $F_{1,47}=58.23$ ,  $P<0.00001$ ) and heat stress ( $F_{1,47}=120.02$ ,  $P<0.00001$ ). Evidence for an interaction of these factors was also found ( $F_{1,47}=9.31$ ,  $P=0.0038$ ). JH stress reactivity in JH-treated Aug21-Gal4/p[UAS-RNAi-InR] females ( $21\pm 2$ ) also decreased to the level typical of p[UAS-RNAi-InR]/CyO::arm-GFP females ( $21\pm 2$ ), whereas the stress reactivity of acetone-treated Aug21-Gal4/p[UAS-RNAi-InR] females ( $28\pm 1$ ) was significantly higher (one-way ANOVA,  $F_{1,24}=14.30$ ,  $P<0.001$ ).

Note that acetone treatment of the flies does not eliminate differences in JH degradation levels (Fig. 2B) or JH stress reactivity between Aug21-Gal4/p[UAS-RNAi-InR] and p[UAS-RNAi-InR]/CyO::arm-GFP females. Both parameters are elevated in females with decreased InR expression in the CA (i.e. Aug21-Gal4/p[UAS-RNAi-InR] females). The comparison of InR downregulation and heat stress effects on JH degradation levels in acetone-treated females revealed significant effects of genotype ( $F_{1,53}=92.31$ ,  $P<0.00001$ ) and heat stress ( $F_{1,53}=170.55$ ,  $P<0.00001$ ). A significant interaction of these factors ( $F_{1,53}=12.84$ ,  $P<0.001$ ) was also found. The differences in stress reactivity between acetone-treated Aug21-Gal4/p[UAS-RNAi-InR] and p[UAS-RNAi-InR]/CyO::arm-GFP females are significant (one-way ANOVA,  $F_{1,24}=11.04$ ,  $P=0.0026$ ).

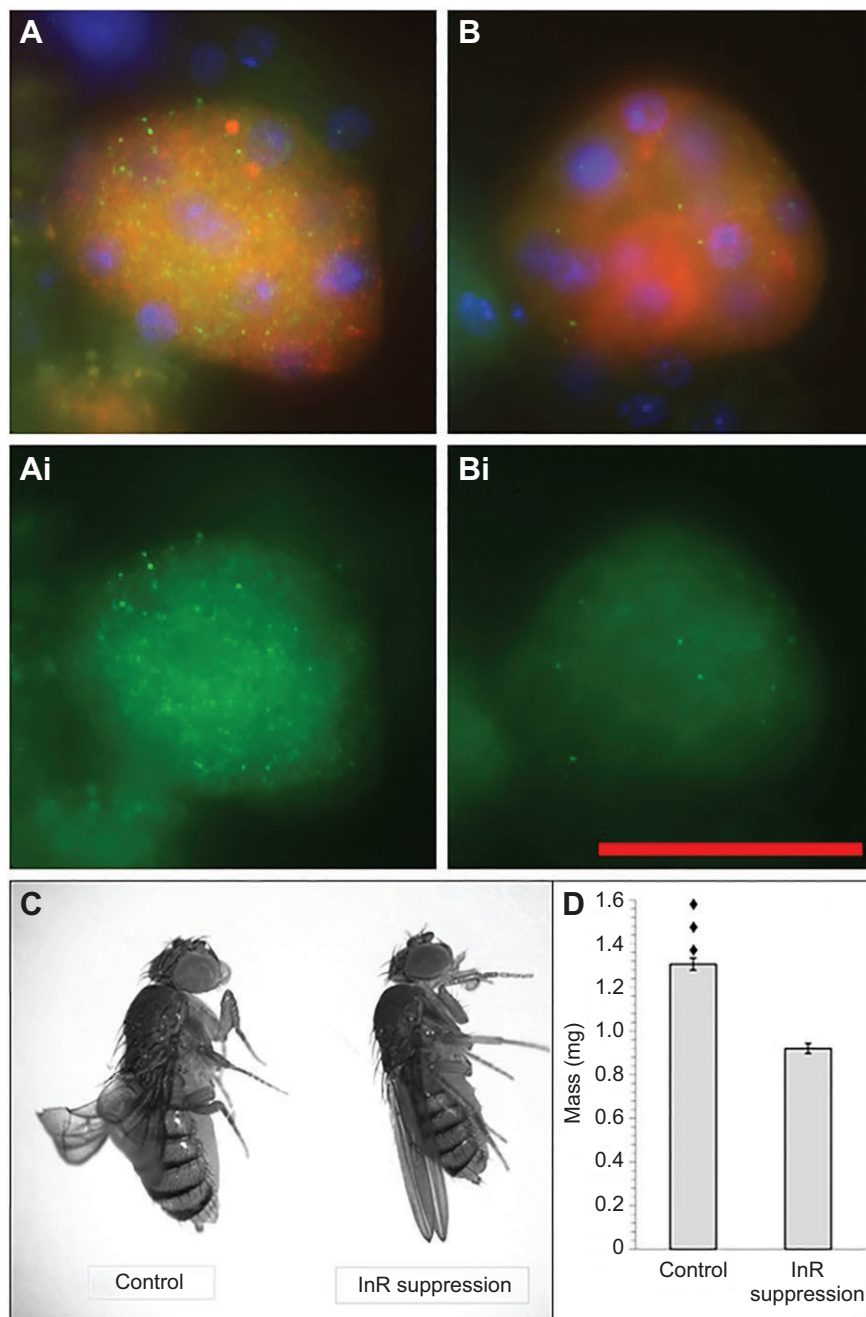

**Fig. 1.** InR immunoreactivity (green signal) in corpus allatum cells (red) of 1-day-old *Drosophila melanogaster* females. (A) CA of Aug21-Gal4;UAS-RFP females; (Ai) the same gland in the green channel. (B) CA of Aug21-Gal4/p[UAS-InR-RNAi];UAS-RFP females; (Bi) the same gland in the green channel. Blue signal: cell nuclei stained with DAPI. Scale bar, 50  $\mu$ m. (C) 1-day-old females: InR suppression: Aug21-Gal4/p[UAS-InR-RNAi] flies; control: p[UAS-RNAi-InR]/CyO::arm-GFP flies. (D) Weight of 1-day-old females.

### Decreased expression of InR in the CA results in reduced fecundity of *Drosophila* females

In previous work, we showed that another indicator of the level of JH production is fecundity; decreased hormone synthesis due to genetic ablation of a portion of the insect's CA cells leads to a dramatic decrease in fecundity (Gruntenko et al., 2010). Fig. 3A shows the results of fecundity evaluation in the Aug21-Gal4/p[UAS-RNAi-InR] flies, which exhibits decreased InR expression in CA, and in p[UAS-RNAi-InR]/CyO::arm-GFP, Aug21-Gal4/CyO::arm-GFP and p[UAS-RNAi-InR]/CyO flies. Most notably, Aug21-Gal4/p[UAS-RNAi-InR] females show dramatically decreased fecundity. The comparison of InR downregulation and age effects on fecundity by two-way mixed design ANOVA (day after eclosion – repeated measures factor; genotype – simple factor) revealed significant effects of genotype

( $F_{3,41}=358.69$ ,  $P<0.00001$ ) and age ( $F_{7,287}=274.64$ ,  $P<0.00001$ ). A significant interaction of these factors in females has also been found ( $F_{21,287}=24.34$ ,  $P<0.00001$ ).

To confirm that decreased JH synthesis in females with decreased InR expression in CA leads to a decrease in fecundity, we treated Aug21-Gal4/p[UAS-RNAi-InR] females with JH dissolved in acetone and measured their fecundity. For comparison, Aug21-Gal4/p[UAS-RNAi-InR] and p[UAS-RNAi-InR]/CyO::arm-GFP females were treated with acetone. The results of this experiment are shown in Fig. 3B. The increased JH levels in Aug21-Gal4/p[UAS-RNAi-InR] females significantly increased their fecundity. The comparison of JH and age effects on fecundity by two-way mixed design ANOVA (day after eclosion – repeated measures factor; JH treatment – simple factor) revealed significant effects of JH ( $F_{1,15}=66.40$ ,  $P<0.00001$ ) and age ( $F_{4,60}=155.91$ ,  $P<0.00001$ ) on

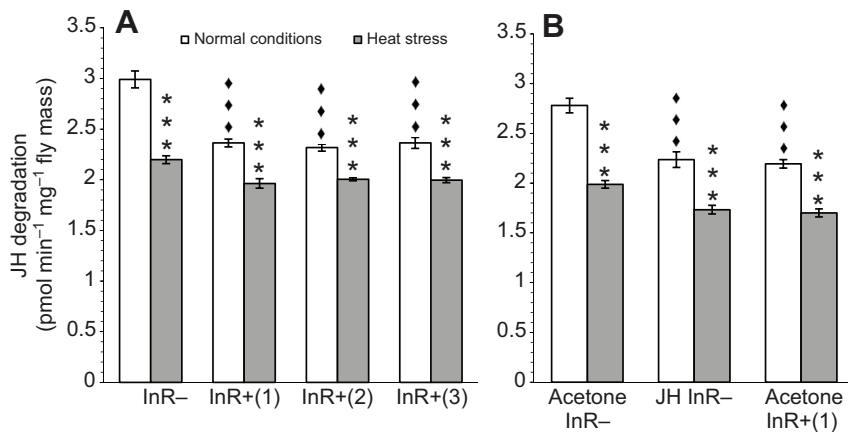

**Fig. 2. Effect of decreased InR expression in the CA on JH degradation.** (A) JH degradation under normal conditions and upon heat stress (38°C, 1.5 h) in Aug21-Gal4/p[UAS-InR-RNAi] females (InR-) with decreased InR expression in CA cells in comparison with control groups: p[UAS-RNAi-InR]/CyO::arm-GFP [InR+(1)], p[UAS-RNAi-InR]/CyO [InR+(2)] and Aug21-Gal4/CyO::arm-GFP [InR+(3)]. (B) The effect of JH and acetone treatment on JH degradation under normal conditions and upon heat stress (38°C, 1.5 h) in InR- and InR+(1) females. The data are given as means  $\pm$  s.e.m. The diamond indicates significant differences from InR- females; the asterisk indicates significant differences between heat-treated and control flies of the same genotype (Newman-Keuls *post hoc* test).

fecundity. A significant interaction of these factors in females was also found ( $F_{4,60}=58.41$ ,  $P<0.00001$ ).

#### Decreased expression of InR in CA results in increased DA content and DA stress reactivity and decreased DA-dependent arylalkylamine N-acetyltransferase activity

To assess the effects of decreased InR expression in CA on DA level, we quantified DA content in Aug21-Gal4/p[UAS-RNAi-InR] (InR-) versus control (p[UAS-RNAi-InR]/CyO::arm-GFP) [InR+(1)] flies under normal and heat stress conditions (Fig. 4A). Aug21-Gal4/p[UAS-RNAi-InR] females had significantly higher DA content than control flies. Comparison of InR downregulation and heat stress effects on the DA levels in females by two-way ANOVA with genotype and temperature as fixed factors revealed significant effects of genotype ( $F_{1,42}=673.73$ ,  $P<0.00001$ ) and heat stress ( $F_{1,42}=79.02$ ,  $P<0.00001$ ) on DA content. A significant interaction of these factors ( $F_{1,42}=15.45$ ,  $P<0.001$ ) was found. The response of DA to stress in females with decreased InR expression in CA was increased relative to control flies: the differences in DA stress reactivity between Aug21-Gal4/p[UAS-RNAi-InR] and p[UAS-RNAi-InR]/CyO::arm-GFP females (26 $\pm$ 2 and 18 $\pm$ 2, respectively) are significant (one-way ANOVA,  $F_{1,21}=8.14$ ,  $P=0.0096$ ).

Earlier (Rauschenbach et al., 2011), we found that in young females of *Drosophila* JH controls DA content at the level of amine degradation by regulating the activity of DA-dependent arylalkylamine N-acetyltransferase [DAT, the primary enzyme that degrades DA (Wright, 1987)]. We have also determined that DAT is not a component of the *Drosophila* stress response (Rauschenbach et al., 1997). Here, we studied the DAT activity of 1-day-old InR-

(Aug21-Gal4/p[UAS-RNAi-InR]) and InR+(1) (p[UAS-RNAi-InR]/CyO::arm-GFP) females under normal conditions. The results are shown in Fig. 4B. The level of DAT activity in Aug21-Gal4/p[UAS-RNAi-InR] females was significantly lower than that in p[UAS-RNAi-InR]/CyO::arm-GFP flies (one-way ANOVA,  $F_{1,36}=32.97$ ,  $P<0.00001$ ). Treatment of Aug21-Gal4/p[UAS-RNAi-InR] females with exogenous JH (Fig. 4C) showed that the decrease in DAT activity is related to the decrease in the endogenous level of the hormone; the activity of the enzyme in JH-treated InR- females (Aug21-Gal4/p[UAS-RNAi-InR]) is increased to the level typical of InR+(1) females (p[UAS-RNAi-InR]/CyO::arm-GFP). The differences in DAT activity between JH and acetone-treated Aug21-Gal4/p[UAS-RNAi-InR] females are significant (one-way ANOVA,  $F_{1,27}=27.20$ ,  $P<0.001$ ).

#### Decreased InR expression in the CA results in decreased alkaline phosphatase and tyrosine hydroxylase activities and decreases in the reactivity of these enzymes to stress

The ALP and TH activities of 1-day-old Aug21-Gal4/p[UAS-RNAi-InR] and control (i.e. p[UAS-RNAi-InR]/CyO::arm-GFP, p[UAS-RNAi-InR]/CyO and Aug21-Gal4/CyO::arm-GFP) females were measured under normal and heat stress conditions. As shown in Fig. 5A,C, a significant decrease in ALP and TH activities was observed in InR- (Aug21-Gal4/p[UAS-RNAi-InR]) females. No statistical significance between the ALP or TH activities of the control InR+ groups (p[UAS-RNAi-InR]/CyO::arm-GFP, p[UAS-RNAi-InR]/CyO and Aug21-Gal4/CyO::arm-GFP) under normal conditions was found. Comparison of InR downregulation and heat stress effects on ALP and TH activity levels in females by two-way ANOVA with

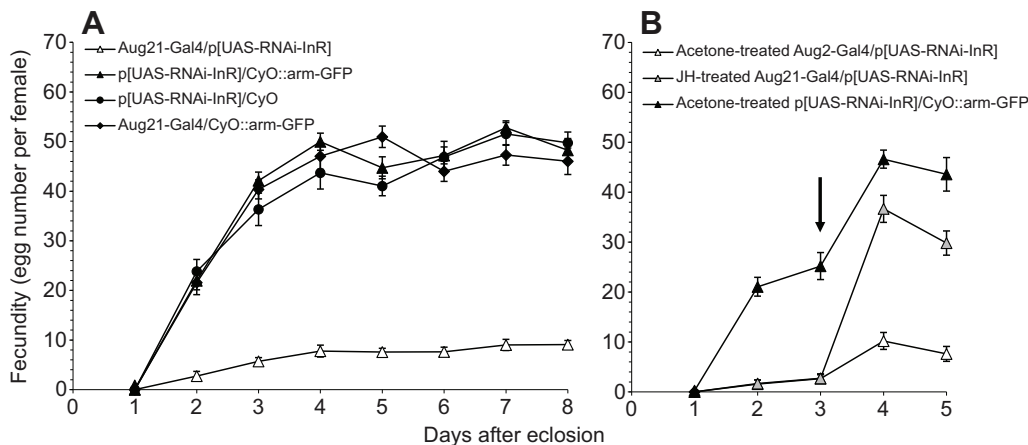

**Fig. 3. Effect of decreased InR expression in the CA on reproduction.** (A) The fecundity of *D. melanogaster* females with RNAi-knockdown of InR in CA (Aug21-Gal4/p[UAS-InR-RNAi]) vs control flies (p[UAS-RNAi-InR]/CyO::arm-GFP, p[UAS-RNAi-InR]/CyO and Aug21-Gal4/CyO::arm-GFP). (B) The effect of JH and acetone treatment on the fecundity of Aug21-Gal4/p[UAS-InR-RNAi] females. The time of JH or acetone application is indicated by the arrow. Data are given as means  $\pm$  s.e.m.

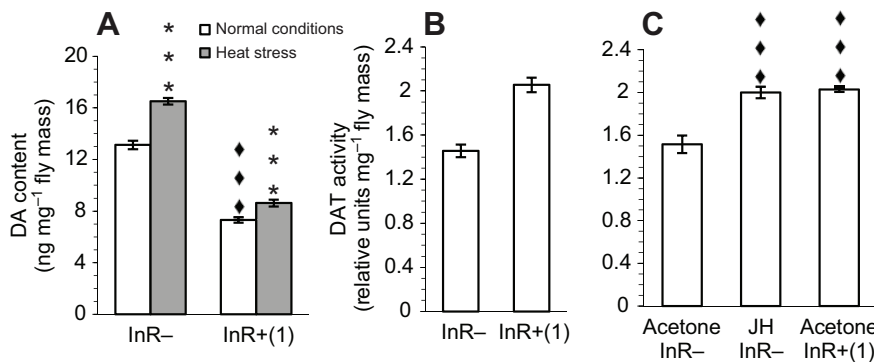

**Fig. 4. Effect of decreased InR expression in the CA on DA content and degradation.** (A) DA level under normal conditions and upon heat stress (38°C, 1 h) in Aug21-Gal4/p[UAS-InR-RNAi] females (InR-) with decreased InR expression in CA cells in comparison with p[UAS-RNAi-InR]/CyO::arm-GFP [InR+(1)] females. (B) DAT activity under normal conditions in InR- and InR+(1) females. (C) The effect of JH and acetone treatment on DAT activity in InR- and InR+(1) females. Data are given as means  $\pm$  s.e.m. The diamond indicates significant differences from InR- females, and the asterisk indicates significant differences between heat-treated and control flies of the same genotype (Newman-Keuls *post hoc* test).

genotype and temperature as fixed factors revealed significant effects of genotype ( $F_{3,164}=38.84$ ,  $P<0.00001$  on ALP activity; and  $F_{3,191}=12.75$ ,  $P<0.00001$  on TH activity) and heat stress ( $F_{1,164}=200.04$ ,  $P<0.00001$  on ALP activity; and  $F_{1,191}=1205.76$ ,  $P<0.00001$  on TH activity). A significant interaction of these factors in females was also found ( $F_{3,164}=10.80$ ,  $P<0.00001$  for ALP; and  $F_{3,191}=26.11$ ,  $P<0.00001$  for TH).

To determine whether downregulation of InR in the CA affects the ALP and TH responses to stress in *Drosophila*, we calculated ALP and TH stress reactivities. No difference in ALP stress reactivity was found among the control groups (40 $\pm$ 2 for p[UAS-RNAi-InR]/CyO::arm-GFP, 40 $\pm$ 2 for p[UAS-RNAi-InR]/CyO and 37 $\pm$ 3 for Aug21-Gal4/CyO::arm-GFP). A lack of differences is also observed for TH stress reactivity in these groups, with values of 58 $\pm$ 1 for p[UAS-RNAi-InR]/CyO::arm-GFP, 63 $\pm$ 1 for p[UAS-RNAi-InR]/CyO and 59 $\pm$ 2 for Aug21-Gal4/CyO::arm-GFP. In contrast, ALP and TH stress reactivities in Aug21-Gal4/p[UAS-RNAi-InR] females were significantly decreased: 19 $\pm$ 1 for ALP and 45 $\pm$ 1 for TH (one-way ANOVA,  $F_{3,78}=31.48$ ,  $P<0.001$  on ALP stress reactivity; and  $F_{3,100}=67.58$ ,  $P<0.00001$  on TH stress reactivity).

#### Juvenile hormone rescues alkaline phosphatase and tyrosine hydroxylase activities and their stress reactivities in females with decreased InR expression in CA

To determine whether the observed changes in the activity and stress reactivity of ALP and TH in Aug21-Gal4/p[UAS-RNAi-InR] females are related to the decreased JH levels in these animals, we studied the effect of JH dissolved in acetone on these parameters. For comparison, Aug21-Gal4/p[UAS-RNAi-InR] and p[UAS-RNAi-InR]/CyO::arm-GFP females were treated with pure acetone. Half of the individuals in each group under study were exposed to heat stress.

As shown in Fig. 5B,D, JH treatment of Aug21-Gal4/p[UAS-RNAi-InR] (InR-) females increased ALP and TH activities to levels typical of p[UAS-RNAi-InR]/CyO::arm-GFP flies [InR+(1)]. Comparison of JH treatment and heat stress effects on the ALP and TH activities of Aug21-Gal4/p[UAS-RNAi-InR] females by two-way ANOVA with JH treatment and temperature as fixed factors revealed significant effects of JH treatment ( $F_{1,36}=158.43$ ,  $P<0.00001$ ) and heat stress ( $F_{1,36}=267.89$ ,  $P<0.00001$ ) on ALP activity and of JH treatment ( $F_{1,70}=57.85$ ,  $P<0.00001$ ) and heat stress ( $F_{1,70}=332.10$ ,  $P<0.00001$ ) on TH activity. Interaction of these

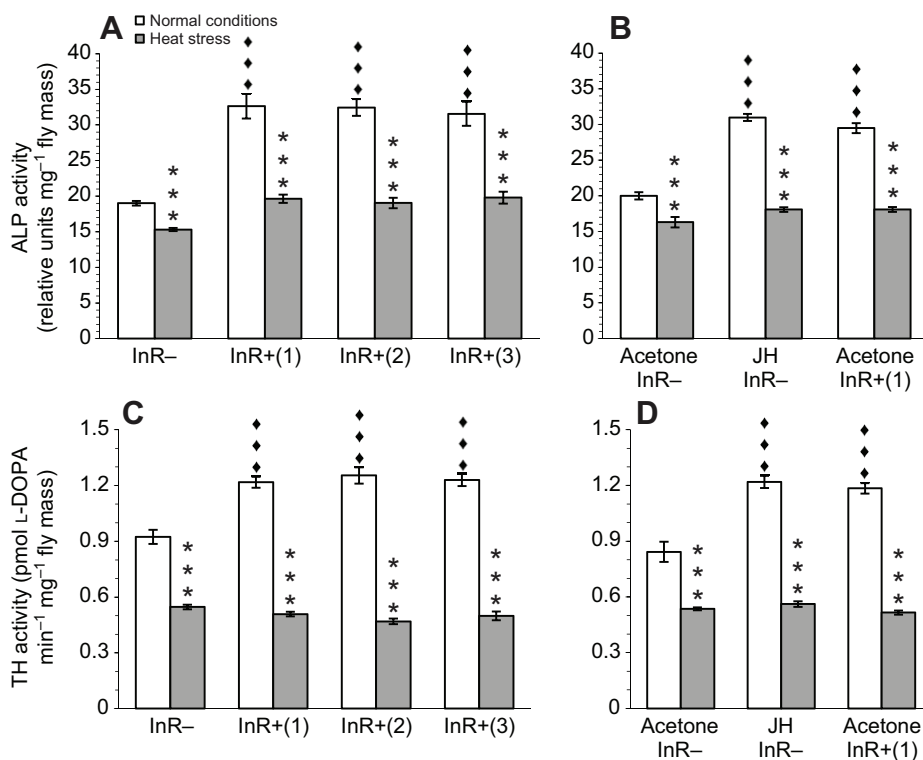

**Fig. 5. Effect of decreased InR expression in the CA on DA metabolism.** (A) ALP activity under normal conditions and upon heat stress (38°C, 1.5 h) in Aug21-Gal4/p[UAS-InR-RNAi] females (InR-) with decreased InR expression in CA cells in comparison with control groups: p[UAS-RNAi-InR]/CyO::arm-GFP [InR+(1)], p[UAS-RNAi-InR]/CyO [InR+(2)] and Aug21-Gal4/CyO::arm-GFP [InR+(3)]. (B) The effect of JH and acetone treatment on ALP activity under normal conditions and upon heat stress (38°C, 1.5 h) in InR- and InR+(1) females. (C) TH activity under normal conditions and upon heat stress (38°C, 1 h) in InR-, InR+(1), InR+(2) and InR+(3) females. (D) The effect of JH and acetone treatment on TH activity under normal conditions and upon heat stress (38°C, 1 h) in InR- and InR+(1) females. Data are given as means  $\pm$  s.e.m. The diamond indicates a significant difference from InR- females, and the asterisk indicates a significant difference between heat-treated and control flies of the same genotype (Newman-Keuls *post hoc* test).

factors was found for both ALP ( $F_{1,36}=82.41$ ,  $P<0.00001$ ) and TH ( $F_{1,70}=44.01$ ,  $P=0.0038$ ). ALP and TH stress reactivities in JH-treated Aug21-Gal4/p[UAS-RNAi-InR] females ( $42\pm 1$  and  $54\pm 1$ , respectively) were also increased compared with acetone-treated Aug21 Gal4/p[UAS-RNAi-InR] females ( $18\pm 4$  and  $36\pm 1$ , respectively), and approached the levels of p[UAS-RNAi-InR]/CyO::arm-GFP females treated with acetone ( $39\pm 1$  for ALP and  $56\pm 1$  for TH). The differences in stress reactivity between JH and acetone-treated Aug21-Gal4/p[UAS-RNAi-InR] females are significant (one-way ANOVA,  $F_{1,18}=41.33$ ,  $P<0.0001$  on ALP stress reactivity; and  $F_{1,43}=121.71$ ,  $P<0.001$  on TH stress reactivity).

## DISCUSSION

As mentioned above, InR expression was detected in CA, the gland that produces JH (Belgacem and Martin, 2006). Belgacem and Martin (Belgacem and Martin, 2007) have also shown that InR in CA controls the expression of 3-hydroxy-3-methylglutaryl coenzyme A reductase, the enzyme that catalyses the synthesis of mevalonate, the precursor of the JH family (Bellés et al., 2005) in adult *Drosophila*. *In vitro*, it has been shown that a mutation of the *InR* gene leads to decreased JH production in adult *Drosophila* (Tatar et al., 2001, Tu et al., 2005).

To study the effect of RNAi knockdown of *InR* in the CA on JH synthesis *in vivo*, we used JH degradation level, stress reactivity of the JH metabolic system, and fecundity as indicators of JH production. Indeed, in *D. melanogaster* females, JH biosynthesis and degradation tend to show an inverse relationship; JH production measured *in vitro* (Altartatz et al., 1991) is significantly higher in 1-day-old than in 5- to 6-day-old females (wild-type strain Canton-S), whereas JH degradation measured *in vivo* is significantly lower in young than in mature Canton-S females (Gruntenko et al., 2003b). The dramatically decreased JH production measured *in vitro* in *D. melanogaster apterous 56f* mutant females (Altartatz et al., 1991) is paralleled by a marked increase in the measured *in vivo* activities of JH-esterase and JH-epoxide hydrolase, the enzymes that degrade JH (Gruntenko et al., 2003b). In addition, we have demonstrated that a pharmacological increase in JH level in wild-type *D. virilis* females leads to a decrease in JH degradation (Rauschenbach et al., 2004). Terashima and Bownes (Terashima and Bownes, 2005) found that JH treatment of *D. melanogaster* females resulted in decreased expression of the *JH-epoxide hydrolase 3* gene. More recently, we showed that decreased JH synthesis resulting from genetic ablation of a subset of CA cells leads to increased JH degradation and stress reactivity of the JH metabolic system in *D. melanogaster* females and to a dramatic decrease in their fecundity (Gruntenko et al., 2010). Taken together, these studies indicate that JH degradation, JH stress reactivity and fecundity may be useful parameters for assessing the level of JH synthesis *in vivo*. Assessment of these parameters in young female *D. melanogaster* provided evidence that RNAi-knockdown of *InR* in the CA leads to decreased JH production; in Aug21-Gal4/p[UAS-RNAi-InR] females, JH degradation and the stress reactivity of the JH metabolic system are increased (see Fig. 2), while fecundity is dramatically decreased (see Fig. 3A). The results of the experiments with JH treatment also indicate the decreased JH synthesis in these females: the exogenous hormone rescued JH degradation (see Fig. 2B), JH stress reactivity and fecundity (see Fig. 3B) in the Aug21-Gal4/p[UAS-RNAi-InR] females to the levels of control flies.

In earlier work, we showed that JH regulates DA content in *Drosophila*: an increase or decrease in JH titer leads to a decrease or an increase in DA content via an increase or a decrease in DAT activity in young females (Rauschenbach et al., 2008;

Rauschenbach et al., 2011; Gruntenko et al., 2012a). Considering this, we supposed that the IIS, by controlling the level of JH, could also affect the metabolism of DA. Measurement of DA content and DAT activity in Aug21-Gal4/p[UAS-RNAi-InR] females, which specifically downregulate InR in the CA, and in control p[UAS-RNAi-InR]/CyO::arm-GFP flies (see Fig. 4A,B) confirmed our supposition: DAT activity is decreased and DA level is increased in 1-day-old Aug21-Gal4/p[UAS-RNAi-InR] females. The fact that exogenous JH restored DAT activity (see Fig. 4C) indicates that the influence of the IIS on DA metabolism is indeed mediated by JH.

As we previously demonstrated, DA downregulates the activity of the enzymes of its synthesis, ALP and TH (Gruntenko et al., 2009; Bogomolova et al., 2010). Taking this into account, one might expect that the activities of ALP and TH would be changed in females with increased DA levels resulting from decreased InR expression in the CA. Measurements of the activities of these enzymes confirmed our expectations: in Aug21-Gal4/p[UAS-RNAi-InR] females, ALP and TH activities were decreased compared with control p[UAS-RNAi-InR]/CyO::arm-GFP females (see Fig. 5A,C). The effects of RNAi knockdown of *InR* in the CA on ALP and TH activities, as well as on DAT, are mediated by JH as shown by the fact that application of JH to Aug21-Gal4/p[UAS-RNAi-InR] flies restores the activity of both enzymes of DA synthesis (see Fig. 5B,D).

It is important to emphasise that decreased InR expression in the CA leads to defects in the development of the neuroendocrine stress reaction. In Aug21-Gal4/p[UAS-RNAi-InR] females, the response of all of the studied components of the stress reaction to heat treatment is changed. Note that the effects of decreased InR expression in the CA on the stress response are mediated by JH; exogenous JH restores stress reactivity of the JH and DA metabolic systems in the Aug21-Gal4/p[UAS-RNAi-InR] females to the level of that in control flies.

The results of our research provide evidence that IIS regulates DA metabolism indirectly via JH in females of *D. melanogaster* and show that it has an effect on the neuroendocrine stress reaction and that it interacts with JH in the control of reproductive functions in this species.

## MATERIALS AND METHODS

### *Drosophila* strains and genetic experiments

The following *Drosophila* strains were utilised in the current study: (1) the Aug21-Gal4/CyO::arm-GFP strain carrying the driver Aug21-Gal4 that is expressed specifically in the CA of larvae (Mirth et al., 2005) and adults (Gruntenko et al., 2012a) of *D. melanogaster*; (2) the p[UAS-RNAi-InR]/CyO strain carrying an RNAi against the *InR* gene inserted on the chromosome II. Crossing Aug21-Gal4/CyO::arm-GFP with p[UAS-RNAi-InR]/CyO flies leads to two types of progeny: Aug21-Gal4/p[UAS-RNAi-InR], where downregulation of InR is targeted to CA cells, and p[UAS-RNAi-InR]/CyO::arm-GFP siblings are used as control. The parental strains serve as additional controls. Note that the presence of mutations in the balancer chromosome CyO should not affect the results of the study as we have previously demonstrated that these mutations do not affect the parameters studied in this work (Gruntenko et al., 2010; Gruntenko et al., 2012a; Gruntenko et al., 2012b). To permit visualisation of CA cells, the Aug21-Gal4::UAS-RFP strain was produced by recombination of Aug21-Gal4 with P{UASp-Act5C.mRFP} (the strain w<sup>\*</sup>;P{UASp-Act5C.mRFP}38 was obtained from the Bloomington *Drosophila* Stock Center).

Crosses were maintained at 29°C to enhance RNAi-induced phenotypes (Fortier and Belote, 2000; Draper et al., 2007) in a 12 h:12 h light:dark cycle on standard *Drosophila* medium. After eclosion, flies were collected (flies eclosed within 3–4 h were pooled) and maintained at 25°C.

### Immunohistochemical analyses

Immunohistochemistry was performed as described by Gruntenko et al. (Gruntenko et al., 2012b). The cardia and corpus cardiacum/corpus allatum complex from flies selectively expressing red fluorescent protein (RFP) in CA cells were dissected and fixed in 4% paraformaldehyde (Sigma-Aldrich, USA), incubated for 2 h at room temperature and washed three times in phosphate-buffered saline (PBS) and three times in PBST (PBS + 0.05% Triton X-100). The tissues were subsequently blocked for 3 h in 10% normal goat serum in PBST. A primary mouse monoclonal IgG1 anti-insulin receptor ( $\alpha$  subunit) antibody (Millipore Corporation, Billerica, MA, USA) at a dilution of 1:20 was added, and the tissues were incubated overnight at 4°C. After three washes in PBST, bound primary antibodies were detected by a secondary antibody, ALEXA488 goat anti-mouse IgG (Invitrogen, Molecular Probes, Eugene, OR, USA), at a dilution of 1:500. After three washes in PBST and one in PBS, the tissues were embedded in Vectashield mounting medium for fluorescence (with DAPI, Vector Laboratories Inc., Burlingame, CA, USA) and observed by fluorescence microscopy (Axioskop 2, Zeiss).

### JH-hydrolysing activity assay

JH hydrolysis was measured as described by Gruntenko et al. (Gruntenko et al., 2012a). Each fly was homogenised in 30  $\mu$ l of ice-cold 0.1 mol l<sup>-1</sup> sodium phosphate buffer, pH 7.4, containing 0.5 mmol l<sup>-1</sup> phenylthiourea. The homogenates were centrifuged for 5 min at 13,030 g, and samples of the supernatant (10  $\mu$ l) were taken for the assay. A mixture consisting of 0.1  $\mu$ g of unlabelled JH-III (Fluka, Buchs, Switzerland, additionally purified before use) and 12,500 d.p.m. JH-III, [10-<sup>3</sup>H(N)]<sup>-</sup> (15 Ci mmol<sup>-1</sup>, Perkin Elmer, Waltham, MA, USA) was used as a substrate. The reaction was carried out in 100  $\mu$ l of the incubation mixture for 30 min and was stopped by the addition of 50  $\mu$ l of a solution containing 5% ammonia, 50% methanol (v/v), and 250  $\mu$ l of heptane. The tubes were shaken vigorously and centrifuged at 13,030 g for 10 min. Samples (100  $\mu$ l) of both the organic and aqueous phases were placed in vials containing dioxane scintillation fluid and counted. Control experiments showed a linear substrate–reaction product relationship; the activity measured is proportional to the amount of supernatant (i.e. enzyme concentration) (Gruntenko et al., 2000). Before JH-hydrolysing activities were measured, half of the flies in each group under study were exposed to heat stress.

### Heat stress

Flies were exposed to heat stress by transferring vials containing experimental flies from a 25°C incubator to a 38°C incubator for 1 h (when examining DA and TH responses to stress) or for 1.5 h (when examining ALP and JH degradation responses to stress).

### JH treatment

Newly eclosed females were placed in vials with standard medium (five flies per vial). Twenty-four hours later, the females were treated with 0.1  $\mu$ g JH-III (Sigma-Aldrich) dissolved in 0.5  $\mu$ l of acetone. Control females were treated with acetone (0.5  $\mu$ l). Ten hours after JH or acetone application, the flies were frozen in liquid nitrogen and stored at -20°C. Half of the JH- and acetone-treated flies were exposed to heat stress.

### Dopamine concentration measurements

DA concentration was measured as described by Gruntenko et al. (Gruntenko et al., 2012a). Flies were homogenised on ice in 0.1 mol l<sup>-1</sup> HClO<sub>4</sub>. The homogenates were centrifuged for 10 min at 13,030 g. The supernatant was filtered through a nylon syringe filter (4 mm/0.45  $\mu$ m, Whatman, Schleicher&Schuell, Germany), and 10  $\mu$ l was injected directly onto an HPLC column through a valve fitted with a 20  $\mu$ l sample loop. Chromatography was carried out in a C18 reverse-phase column (Diaspher-110-C18, 2.1 × 150 mm, 5  $\mu$ m average particle size, BioChemMak, Russia) using an Agilent 1100 HPLC system with a quaternary pump, vacuum degasser and thermostatically controlled column compartment. The separated compounds were detected simultaneously by a variable wavelength detector (10 mm path length, 13  $\mu$ l cell volume) set at 280 nm. Signals from the UV detector were recorded and integrated by a PC (Agilent

ChemStation A.08.04). The flow rate was maintained at 0.3 ml min<sup>-1</sup>. The mobile phase consisted of 0.025 mol l<sup>-1</sup> KH<sub>2</sub>PO<sub>4</sub> (pH 3.0), 1 mmol l<sup>-1</sup> sodium octanesulfonate as an ion-pair reagent and 5% (v/v) acetonitrile. The concentration of DA was calculated by comparing the peak areas of the sample with those of standards. The identity of the DA peak in *Drosophila* samples was confirmed by comparison of its retention time with that of the standard mixture. The UV spectra of the DA peaks in *Drosophila* samples corresponded to the UV spectrum of DA. Moreover, we added excess quantities of DA (20 ng per 100  $\mu$ l of sample) to some *Drosophila* samples to register the changes in area of the appropriate peaks.

### DA-dependent arylalkylamine N-acetyltransferase activity measurements

DAT activity was measured as described previously (Rauschenbach et al., 2008). Flies were homogenised on ice in 0.05 mol l<sup>-1</sup> Tris buffer (pH 7.2), one individual in 60  $\mu$ l. The homogenates were centrifuged for 5 min at 13,030 g. The components of the reaction mixture were added to a cuvette as follows: 50  $\mu$ l of 0.05 mol l<sup>-1</sup> Tris (pH 7.2, Sigma-Aldrich), 50  $\mu$ l of acetyl CoA [0.5 mmol l<sup>-1</sup>, Fluka, Buchs, Switzerland, in 0.05 mol l<sup>-1</sup> Tris (pH 7.2)], 25  $\mu$ l of 12 mmol l<sup>-1</sup> phenylthiourea (Fluka), 25  $\mu$ l of substrate (40 mmol l<sup>-1</sup> DA, Sigma, Steinheim, Germany, in 0.001 mol l<sup>-1</sup> HCl), 50  $\mu$ l of the supernatant and 50  $\mu$ l of 5,5-dithiobis-(2-nitro-benzoic acid) (2.4 mmol l<sup>-1</sup>, Fluka, in 0.05 mol l<sup>-1</sup> Tris). The samples were incubated for 2 min at room temperature in the dark. The optical density of the reaction product was measured with a double-beam spectrophotometer (UV-2401PC, Shimadzu Corporation, Kyoto, Japan) at a wavelength of 405 nm against the reaction zero point. DAT activity is represented in relative units (optical density × 100).

### Alkaline phosphatase activity measurements

ALP assays were performed as described previously (Rauschenbach et al., 2007). Flies were homogenised on ice in 0.1 mol l<sup>-1</sup> Tris-phosphate buffer, pH 8.60 (Sigma-Aldrich) (one fly in 20  $\mu$ l). The homogenates were centrifuged for 5 min at 13,030 g. Enzyme activity in the supernatant was determined using  $\alpha$ -naphthylphosphate (ICN, Moscow, Russia) as substrate and fast blue RR salt (Chemapol, Czech Republic) as stain. After centrifugation, the supernatant was transferred to a microtube (1.5 ml; Eppendorf, Germany) to which 1 ml of reaction mixture [100 ml of 0.1 mol l<sup>-1</sup> Tris buffer, pH 8.60, 100 mg  $\alpha$ -naphthylphosphate, 100 mg fast blue RR salt, 230  $\mu$ l 10% MnCl, 230  $\mu$ l 10% MgCl, 0.5 g polyvinylpyrrolidone (ICN, Russia) and 2 g NaCl] was added. Incubation was carried out at room temperature in the dark for 25 min, and the reaction was stopped by the addition of 3 ml of ice-cold distilled water. The optical density of the obtained reaction product was measured at 470 nm using a Bio-Rad SmartSpec Plus spectrophotometer (Bio-Rad Laboratories, Philadelphia, PA, USA). ALP activity is represented in relative units (optical density × 100).

### Tyrosine hydroxylase activity measurements

TH assays were performed as described previously (Gruntenko et al., 2009). Flies were homogenised in chilled 0.1 mol l<sup>-1</sup> acetate buffer, pH 7.0 (one fly in 10  $\mu$ l) and centrifuged at 13,030 g for 5 min; the supernatant was used for the reaction. The reaction mixture (100  $\mu$ l) consisted of 0.1 mmol l<sup>-1</sup> L-tyrosine (Sigma, Germany), 1  $\mu$ Ci L-[ring-3,5-<sup>3</sup>H] tyrosine (40 Ci mmol<sup>-1</sup>, Perkin Elmer, Boston, MA, USA), 1 mmol l<sup>-1</sup> (6R)-5,6,7,8-tetrahydrobiopterin (Sigma-Aldrich), 80 mmol l<sup>-1</sup>  $\beta$ -mercaptoethanol and 20  $\mu$ g catalase (Fluka) in 0.1 mol l<sup>-1</sup> acetate buffer (pH 7.0). Incubation was carried out for 15 min at 32°C. All assays were run in duplicate with zero time controls and terminated by addition of 1 ml of 7.5% activated charcoal (Darco G60, Fluka). The assay mixtures were stirred for 10 min and centrifuged at 13,030 g for 5 min; 100  $\mu$ l aliquots of the supernatant were transferred to scintillation vials and counted using a Rackbeta 1209 (Vellag, Turku, Finland) scintillation counter.

### Fecundity analysis

Fecundity analysis was performed as follows: three newly eclosed females and three males were placed into vials, the bottom and 1 cm of the walls of which were covered with filter paper soaked in 0.5 ml of nutritional medium containing 0.5% sucrose and 0.1% yeast. The flies were transferred to vials

with fresh medium daily. To study the effect of JH on fecundity, 3-day-old females were treated with acetone or JH as described above and their fecundity was evaluated. Fecundity was determined as the number of eggs laid by a female within 24 h (the number of eggs laid in each vial was related to the number of females held in the vial for 24 h).

### Statistical analysis

The stress reactivities of DA, TH, ALP and JH were calculated as per cent change in DA level or ALP, TH or JH-hydrolysing activities following heat stress relative to the values of the corresponding parameters obtained under normal conditions (each value obtained at 38°C was compared with the average value obtained at 25°C). The significance of differences between the data sets was tested by one-way and two-way ANOVA. The data on fecundity were analysed using two-way mixed-design ANOVA. Statistical comparisons between groups were performed using the Newman–Keuls *post hoc* test.

### Acknowledgements

We are grateful to Professor Jean-Rene Martin (Laboratoire de Neurobiologie Cellulaire et Moléculaire, CNRS, Gif-sur-Yvette, France) for *D. melanogaster* strain p[UAS-RNAi-InR]/CyO. We are also grateful to Professor Sheng Li (Institute of Plant Physiology and Ecology, Shanghai Institute of Biological Sciences of the Chinese Academy of Sciences) for *D. melanogaster* strain Aug21-Gal4/CyO::arm-GFP.

### Competing interests

The authors declare no competing financial interests.

### Author contributions

All authors contributed to the conception, design, execution and interpretation of the findings.

### Funding

The study was supported by grants from the Russian Foundation for Basic Research (12-04-00065, 13-04-00019) and Russian Federation Basic Project #VI.53.2.3.

### References

- Altartz, M., Applebaum, S. W., Richard, D. S., Gilbert, L. I. and Segal, D. (1991). Regulation of juvenile hormone synthesis in wild-type and apterous mutant *Drosophila*. *Mol. Cell. Endocrinol.* **81**, 205–216.
- Andersen, J. P., Schwartz, A., Gramsbergen, J. B. and Loeschcke, V. (2006). Dopamine levels in the mosquito *Aedes aegypti* during adult development, following food feeding and in response to heat stress. *J. Insect Physiol.* **52**, 1163–1170.
- Belgacem, Y. H. and Martin, J. R. (2002). Neuroendocrine control of a sexually dimorphic behavior by a few neurons of the pars intercerebralis in *Drosophila*. *Proc. Natl. Acad. Sci. USA* **99**, 15154–15158.
- Belgacem, Y. H. and Martin, J. R. (2006). Disruption of insulin pathways alters trehalose level and abolishes sexual dimorphism in locomotor activity in *Drosophila*. *J. Neurobiol.* **66**, 19–32.
- Belgacem, Y. H. and Martin, J.-R. (2007). Hmgar in the corpus allatum controls sexual dimorphism of locomotor activity and body size via the insulin pathway in *Drosophila*. *PLoS ONE* **2**, e187.
- Bellés, X., Martín, D. and Piulachs, M. D. (2005). The mevalonate pathway and the synthesis of juvenile hormone in insects. *Ann. Rev. Entomol.* **50**, 181–199.
- Bogomolova, E. V., Rauschenbach, I. Y., Adonyeva, N. V., Alekseev, A. A., Faddeeva, N. V. and Gruntenko, N. E. (2010). Dopamine down-regulates activity of alkaline phosphatase in *Drosophila*: the role of D2-like receptors. *J. Insect Physiol.* **56**, 1155–1159.
- Broughton, S. J., Piper, M. D., Ikeya, T., Bass, T. M., Jacobson, J., Driege, Y., Martinez, P., Hafen, E., Withers, D. J., Leever, S. J. et al. (2005). Longer lifespan, altered metabolism, and stress resistance in *Drosophila* from ablation of cells making insulin-like ligands. *Proc. Natl. Acad. Sci. USA* **102**, 3105–3110.
- Clancy, D. J., Gems, D., Harshman, L. G., Oldham, S., Stocker, H., Hafen, E., Leever, S. J. and Partridge, L. (2001). Extension of life-span by loss of CHICO, a *Drosophila* insulin receptor substrate protein. *Science* **292**, 104–106.
- Colombani, J., Bianchini, L., Layalle, S., Pondeville, E., Dauphin-Villemant, C., Antoniewski, C., Carré, C., Noselli, S. and Léopold, P. (2005). Antagonistic actions of ecdysone and insulins determine final size in *Drosophila*. *Science* **310**, 667–670.
- Cymborowski, B. (1991). Effects of cold stress on endocrine system in *Galleria melonella*. In *Hormones and Metabolism in Insect Stress* (ed. J. Ivanovic and M. Jankovic-Hladni), pp. 99–114. Boca Raton, FL: CRC Press.
- Davenport, A. K. and Evans, P. D. (1984). Stress-induced changes in octopamine levels of insect haemolymph. *Insect Biochem.* **14**, 135–143.
- Draper, I., Kurshan, P. T., McBride, E., Jackson, F. R. and Kopin, A. S. (2007). Locomotor activity is regulated by D2-like receptors in *Drosophila*: an anatomic and functional analysis. *Dev. Neurobiol.* **67**, 378–393.
- Fortier, E. and Belote, J. M. (2000). Temperature-dependent gene silencing by an expressed inverted repeat in *Drosophila*. *Genesis* **26**, 240–244.
- Gruntenko, N. E. and Rauschenbach, I. Y. (2008). Interplay of JH, 20E and biogenic amines under normal and stress conditions and its effect on reproduction. *J. Insect Physiol.* **54**, 902–908.
- Gruntenko, N. E., Wilson, T. G., Monastiriotti, M. and Rauschenbach, I. Y. (2000). Stress-reactivity and juvenile hormone degradation in *Drosophila melanogaster* strains having stress-related mutations. *Insect Biochem. Mol. Biol.* **30**, 775–783.
- Gruntenko, N. E., Bownes, M., Terashima, J., Sukhanova, M. Z. and Rauschenbach, I. Y. (2003a). Heat stress affects oogenesis differently in wild-type *Drosophila virilis* and a mutant with altered juvenile hormone and 20-hydroxyecdysone levels. *Insect Mol. Biol.* **12**, 393–404.
- Gruntenko, N. E., Chentsova, N. A., Andreenkova, E. V., Bownes, M., Segal, D., Adonyeva, N. V. and Rauschenbach, I. Y. (2003b). Stress response in a juvenile hormone-deficient *Drosophila melanogaster* mutant apterous 56f. *Insect Mol. Biol.* **12**, 353–363.
- Gruntenko, N., Chentsova, N. A., Bogomolova, E. V., Karpova, E. K., Glazko, G. V., Faddeeva, N. V., Monastiriotti, M. and Rauschenbach, I. Y. (2004). The effect of mutations altering biogenic amine metabolism in *Drosophila* on viability and the response to environmental stresses. *Arch. Insect Biochem. Physiol.* **55**, 55–67.
- Gruntenko, N. E., Karpova, E. K., Chentsova, N. A., Adonyeva, N. V. and Rauschenbach, I. Y. (2009). 20-hydroxyecdysone and juvenile hormone influence tyrosine hydroxylase activity in *Drosophila* females under normal and heat stress conditions. *Arch. Insect Biochem. Physiol.* **72**, 263–272.
- Gruntenko, N. E., Wen, D., Karpova, E. K., Adonyeva, N. V., Liu, Y., He, Q., Faddeeva, N. V., Fomin, A. S., Li, S. and Rauschenbach, I. Y. (2010). Altered juvenile hormone metabolism, reproduction and stress response in *Drosophila* adults with genetic ablation of the corpus allatum cells. *Insect Biochem. Mol. Biol.* **40**, 891–897.
- Gruntenko, N. E., Bogomolova, E. V., Adonyeva, N. V., Karpova, E. K., Menshanov, P. N., Alekseev, A. A., Romanova, I. V., Li, S. and Rauschenbach, I. Y. (2012a). Decrease in juvenile hormone level as a result of genetic ablation of the corpus allatum cells affects the synthesis and metabolism of stress related hormones in *Drosophila*. *J. Insect Physiol.* **58**, 49–55.
- Gruntenko, N. E., Laukhina, O. V., Bogomolova, E. V., Karpova, E. K., Menshanov, P. N., Romanova, I. V. and Rauschenbach, I. Y. (2012b). Downregulation of the dopamine D2-like receptor in corpus allatum affects juvenile hormone synthesis in *Drosophila melanogaster* females. *J. Insect Physiol.* **58**, 348–355.
- Gulia-Nuss, M., Robertson, A. E., Brown, M. R. and Strand, M. R. (2011). Insulin-like peptides and the target of rapamycin pathway coordinately regulate blood digestion and egg maturation in the mosquito *Aedes aegypti*. *PLoS ONE* **6**, e20401.
- Hirashima, A. and Eto, M. (1993). Effect of stress on levels of octopamine, dopamine and serotonin in the American cockroach (*Periplaneta americana* L.). *Comp. Biochem. Physiol.* **105C**, 279–284.
- Hirashima, A., Rauschenbach, I. Y. and Sukhanova, M. Jh., (2000a). Ecdysteroids in stress responsive and nonresponsive *Drosophila virilis* lines under stress conditions. *Biosci. Biotechnol. Biochem.* **64**, 2657–2662.
- Hirashima, A., Sukhanova, M. Jh., and Rauschenbach I. Yu., (2000b). Biogenic amines in *Drosophila virilis* under stress conditions. *Biosci. Biotechnol. Biochem.* **64**, 2625–2630.
- Kannan, K. and Fridell, Y. W. (2013). Functional implications of *Drosophila* insulin-like peptides in metabolism, aging, and dietary restriction. *Front. Physiol.* **4**, 288.
- Lalouette, L., Kostál, V., Colinet, H., Gagneul, D. and Renault, D. (2007). Cold exposure and associated metabolic changes in adult tropical beetles exposed to fluctuating thermal regimes. *FEBS J.* **274**, 1759–1767.
- Mirth, C., Truman, J. W. and Riddiford, L. M. (2005). The role of the prothoracic gland in determining critical weight for metamorphosis in *Drosophila melanogaster*. *Curr. Biol.* **15**, 1796–1807.
- Neckameyer, W. S. and Weinstein, J. S. (2005). Stress affects dopaminergic signaling pathways in *Drosophila melanogaster*. *Stress* **8**, 117–131.
- Orchard, I., Loughton, B. G. and Webb, R. A. (1981). Octopamine and short-term hyperlipaemia in the locust. *Gen. Comp. Endocrinol.* **45**, 175–180.
- Piper, M. D., Selman, C., McElwee, J. J. and Partridge, L. (2008). Separating cause from effect: how does insulin/IGF signalling control lifespan in worms, flies and mice? *J. Intern. Med.* **263**, 179–191.
- Rauschenbach, I. Yu., Lukashina, N. S., Maksimovsky, L. F. and Korochkin, L. I. (1987). Stress-like reaction of *Drosophila* to adverse environmental factors. *J. Comp. Physiol. B* **157**, 519–531.
- Rauschenbach, I. Yu., Serova, L. I., Timochina, I. S., Chentsova, N. A. and Schumnaja, L. V. (1993). Analysis of differences in dopamine content between two lines of *Drosophila virilis* in response to heat stress. *J. Insect Physiol.* **39**, 761–767.
- Rauschenbach, I. Yu., Khlebodarova, T. M., Chentsova, N. A., Gruntenko, N. E., Grenback, L. G., Yantsen, E. I. and Filipenko, M. L. (1995a). Metabolism of the juvenile hormone in *Drosophila* adults under normal conditions and heat stress. *J. Insect Physiol.* **41**, 179–189.
- Rauschenbach, I. Yu., Shumnaya, L. V., Khlebodarova, T. M., Chentsova, N. A. and Grenback, L. G. (1995b). Role of phenol oxidases and tyrosine hydroxylase in control of dopamine content in *Drosophila virilis* under normal conditions and heat stress. *J. Insect Physiol.* **41**, 279–286.
- Rauschenbach, I. Yu., Sukhanova, M. J., Shumnaya, L. V., Gruntenko, N. E., Grenback, L. G., Khlebodarova, T. M. and Chentsova, N. A. (1997). Role of DOPA decarboxylase and N-acetyl transferase in regulation of dopamine content in *Drosophila virilis* under normal and heat stress conditions. *Insect Biochem. Mol. Biol.* **27**, 729–734.
- Rauschenbach, I. Yu., Gruntenko, N. E., Bownes, M., Adonieva, N. V., Terashima, J., Karpova, E. K., Faddeeva, N. V. and Chentsova, N. A. (2004). The role of



- juvenile hormone in the control of reproductive function in *Drosophila virilis* under nutritional stress. *J. Insect Physiol.* **50**, 323-330.
- Rauschenbach, I. Yu., Bogomolova, E. V., Gruntenko, N. E., Adonyeva, N. V. and Chentsova, N. A.** (2007). Effects of juvenile hormone and 20-hydroxyecdysone on alkaline phosphatase activity in *Drosophila* under normal and heat stress conditions. *J. Insect Physiol.* **53**, 587-591.
- Rauschenbach, I. Yu., Adonyeva, N. V., Alekseev, A. A., Chentsova, N. A. and Gruntenko, N. E.** (2008). Role of arylalkylamine N-acetyltransferase in regulation of biogenic amines levels by gonadotropins in *Drosophila*. *J. Comp. Physiol. B* **178**, 315-320.
- Rauschenbach, I. Yu., Bogomolova, E. V., Karpova, E. K., Adonyeva, N. V., Faddeeva, N. V., Menshanov, P. N. and Gruntenko, N. E.** (2011). Mechanisms of age-specific regulation of dopamine metabolism by juvenile hormone and 20-hydroxyecdysone in *Drosophila* females. *J. Comp. Physiol. B* **181**, 19-26.
- Richard, D. S., Rybczynski, R., Wilson, T. G., Wang, Y., Wayne, M. L., Zhou, Y., Partridge, L. and Harshman, L. G.** (2005). Insulin signaling is necessary for vitellogenesis in *Drosophila melanogaster* independent of the roles of juvenile hormone and ecdysteroids: female sterility of the chico<sup>1</sup> insulin signaling mutation is autonomous to the ovary. *J. Insect Physiol.* **51**, 455-464.
- Roesijadi, G., Rezvankhah, S., Binninger, D. M. and Weissbach, H.** (2007). Ecdysone induction of MsrA protects against oxidative stress in *Drosophila*. *Biochem. Biophys. Res. Commun.* **354**, 511-516.
- Rulifson, E. J., Kim, S. K. and Nusse, R.** (2002). Ablation of insulin-producing neurons in flies: growth and diabetic phenotypes. *Science* **296**, 1118-1120.
- Shingleton, A. W., Das, J., Vinicius, L. and Stern, D. L.** (2005). The temporal requirements for insulin signaling during development in *Drosophila*. *PLoS Biol.* **3**, e289.
- Sukhanova, M. Jh., Grenback, L. G., Gruntenko, N. E., Khlebodarova, T. M. and Rauschenbach, I. Yu.** (1996). Alkaline phosphatase in *Drosophila* under heat stress. *J. Insect Physiol.* **42**, 161-165.
- Sukhanova, M. Jh., Shumnaya, L. V., Grenback, L. G., Gruntenko, N. E., Khlebodarova, T. M. and Rauschenbach, I. Yu.** (1997). Tyrosine decarboxylase and dopa decarboxylase in *Drosophila virilis* under heat stress. *Biochem. Genet.* **35**, 91-103.
- Tatar, M., Kopelman, A., Epstein, D., Tu, M. P., Yin, C. M. and Garofalo, R. S.** (2001). A mutant *Drosophila* insulin receptor homolog that extends life-span and impairs neuroendocrine function. *Science* **292**, 107-110.
- Tatar, M., Bartke, A. and Antebi, A.** (2003). The endocrine regulation of aging by insulin-like signals. *Science* **299**, 1346-1351.
- Terashima, J. and Bownes, M.** (2005). A microarray analysis of genes involved in relating egg production to nutritional intake in *Drosophila melanogaster*. *Cell Death Differ.* **12**, 429-440.
- Toivonen, J. M. and Partridge, L.** (2009). Endocrine regulation of aging and reproduction in *Drosophila*. *Mol. Cell. Endocrinol.* **299**, 39-50.
- Tu, M.-P., Yin, C.-M. and Tatar, M.** (2002). Impaired ovarian ecdysone synthesis of *Drosophila melanogaster* insulin receptor mutants. *Aging Cell* **1**, 158-160.
- Tu, M.-P., Yin, C.-M. and Tatar, M.** (2005). Mutations in insulin signaling pathway alter juvenile hormone synthesis in *Drosophila melanogaster*. *Gen. Comp. Endocrinol.* **142**, 347-356.
- Woodring, J. P., Meier, O. W. and Rose, R.** (1988). Effect of development, photoperiod, and stress on octopamine levels in the house cricket, *Acheta domesticus*. *J. Insect Physiol.* **34**, 759-765.
- Wright, T. R. F.** (1987). The genetics of biogenic amine metabolism, sclerotization, and melanization in *Drosophila melanogaster*. *Adv. Genet.* **24**, 127-222.
